1 **Chiral twisting in cytoskeletal polymers regulates filament size and orientation**

2

3 Handuo Shi<sup>1</sup>, David Quint<sup>1,2,3</sup>, Ajay Gopinathan<sup>2,3</sup>, Kerwyn Casey Huang<sup>1,4,5,†</sup>

4

5 <sup>1</sup>Department of Bioengineering, Stanford University, Stanford, CA 94305, USA

6 <sup>2</sup>Department of Physics, University of California at Merced, Merced, CA 95343, USA

7 <sup>3</sup>NSF-CREST: Center for Cellular and Biomolecular Machines, University of California at

8 Merced, Merced, CA 95343, USA

9 <sup>4</sup>Department of Microbiology and Immunology, Stanford University, Stanford, CA 94305,

10 USA

11 <sup>5</sup>Chan Zuckerberg Biohub, San Francisco, CA 94158

12

13 †Corresponding author:

14 Kerwyn Casey Huang

15 Stanford University, Department of Bioengineering

16 443 Via Ortega

17 Shriram Center, Room 007

18 Stanford, CA 94305, USA

19 Phone: (650) 721-2483

20 Email: [kchuang@stanford.edu](mailto:kchuang@stanford.edu)

21 **Abstract**

22 While cytoskeletal proteins in the actin family are structurally similar, as filaments they  
23 act as critical components of diverse cellular processes across all kingdoms of life. In  
24 many rod-shaped bacteria, the actin homolog MreB directs cell-wall insertion and  
25 maintains cell shape, but it remains unclear how structural changes to MreB affect its  
26 physiological function. To bridge this gap, we performed molecular dynamics  
27 simulations for *Caulobacter crescentus* MreB and then utilized a coarse-grained  
28 biophysical model to successfully predict MreB filament properties *in vivo*. We  
29 discovered that MreB double protofilaments exhibit left-handed twisting that is  
30 dependent on the bound nucleotide and membrane binding; the degree of twisting  
31 determines the limit length and orientation of MreB filaments *in vivo*. Membrane binding  
32 of MreB also induces a stable membrane curvature that is physiologically relevant.  
33 Together, our data empower the prediction of cytoskeletal filament size from molecular  
34 dynamics simulations, providing a paradigm for connecting protein filament structure  
35 and mechanics to cellular functions.

## 36 **Introduction**

37 The actin and tubulin families of cytoskeletal proteins constitute essential components  
38 of cellular physiology in virtually all bacteria, archaea, and eukaryotes. Despite  
39 structural similarities within each of the two families, their primary functions span a  
40 diverse range of processes including cell morphogenesis<sup>1</sup>, division<sup>2,3</sup>, and DNA  
41 segregation<sup>4</sup>. In bacteria, many of these cytoskeletal proteins form filaments that are  
42 highly dynamic *in vivo*. Structural tools such as X-ray crystallography and cryo-electron  
43 microscopy have elucidated various filament structures within the bacterial actin family,  
44 including anti-parallel, straight double protofilaments of MreB<sup>5</sup>, single, polar polymers of  
45 FtsA<sup>3</sup>, and bipolar, anti-parallel filaments of ParM<sup>4</sup>, suggesting that filament  
46 conformations are highly tunable and have been selected for particular physiological  
47 functions over evolutionary time. However, the links between the conformational  
48 dynamics of these proteins *in vivo* and the molecular mechanisms by which they  
49 regulate cell physiology remain undiscovered. Molecular dynamics (MD) simulations are  
50 a powerful tool for identifying protein structural dynamics and filament mechanics at  
51 atomic resolution, providing key information to map filament properties from the protein  
52 to the cellular scales.

53

54 One such cellular-scale property defined by a bacterial actin homolog is cell shape,  
55 which is ultimately dictated by the rigid cell wall, a highly crosslinked mesh of  
56 peptidoglycan. During growth, cells actively remodel their cell wall while robustly  
57 maintaining their shape<sup>6</sup>. In rod-shaped bacteria such as *Escherichia coli*, cell-wall  
58 synthesis during elongation is regulated by the widely conserved actin homolog MreB<sup>7</sup>,

59 which dictates the pattern of insertion of new cell-wall material<sup>8</sup> and thereby maintains  
60 rod shape<sup>7,9</sup>. Genetic depletion and chemical inhibition of MreB lead to misshapen cells  
61 and eventually cell lysis<sup>10,11</sup>. Many point mutations in MreB alter cell shape in subtle  
62 ways, such as changing cell width<sup>12-14</sup>, curvature<sup>15</sup>, or polar morphology<sup>14,16</sup> without  
63 affecting viability. In *E. coli*, MreB forms short filaments that move along the cell  
64 periphery<sup>1</sup>, and the localization and movement of these filaments are correlated with cell  
65 width<sup>17</sup>. MreB movement is chiral, which induces twist in the cell body during  
66 elongation<sup>17,18</sup>. Previous MD studies of *Thermotoga maritima* MreB (TmMreB) showed  
67 that ATP hydrolysis and polymerization affect MreB monomer conformation, which in  
68 turn regulates the bending of MreB dimers<sup>19</sup>. The bending of a TmMreB dimer was also  
69 altered *in silico* by binding the membrane protein RodZ, which directly interacts with  
70 MreB and tunes cell shape<sup>20</sup>. In *E. coli*, MreB forms antiparallel double protofilaments<sup>5</sup>  
71 that can deform membranes<sup>21</sup>, and the double protofilament conformation is essential  
72 for rod-shape maintenance in *E. coli*<sup>5</sup>. However, it remains obscure how molecular-level  
73 changes in MreB connect to the biophysics of the double protofilament structure, and to  
74 the functions of MreB *in vivo*.

75

76 In this study, we exploited the recent solution of a crystal structure of a double  
77 protofilament of *Caulobacter crescentus* MreB<sup>5</sup> (CcMreB) to uncover the connection  
78 between MreB structural dynamics *in silico* and filament conformation *in vivo*. We  
79 performed all-atom MD simulations for each step during CcMreB filament assembly  
80 (Fig. 1), from monomers to single protofilaments, and then to double protofilaments with  
81 or without a membrane. Simulations of double protofilaments revealed a new left-

82 handed twisting conformation in ATP-bound double protofilaments. The degree of  
83 twisting was reduced when the double protofilaments were bound to ADP or a  
84 membrane, and binding to a membrane induced membrane curvature mimicking that of  
85 bacterial cells. We used our MD simulations to extract parameters relevant for coarse-  
86 grained analyses of membrane-bound MreB double protofilaments, from which we  
87 established a connection between intrinsic twisting and filament limit length, which we  
88 verified *in vivo* with *E. coli* MreB mutants. Taken together, our results link the molecular-  
89 scale behaviors of MreB to cellular phenotypes in *E. coli*, providing a paradigm for  
90 connecting protein structure to cellular function across disparate length scales.

## 91 **Results**

92

### 93 **MreB monomer conformation is nucleotide- and polymerization-dependent**

94 To study the first step of MreB oligomeric assembly (Fig. 1), we performed all-atom MD  
95 simulations of MreB as a monomer and as a dimer in a single protofilament (Fig. 2a,  
96 Methods). All simulations were initialized from the crystal structure of the CcMreB single  
97 protofilament (PDB ID: 4CZF)<sup>5</sup>. By analogy with actin, we refer to the two subunits in an  
98 MreB dimer as the (+) and (-) ends (Fig. 2a, right). The four subdomains were defined  
99 by aligning the MreB structure to that of actin, with the nucleotide bound in the center of  
100 the four subdomains (Fig. 2b)<sup>5</sup>.

101

102 In our simulations of an ATP-bound MreB monomer, we observed a rapid opening of  
103 subdomains IB and IIB, exposing the ATP-binding pocket. We quantified conformational  
104 changes by measuring the angles formed by the centers-of-mass of the four  
105 subdomains, defining an in-plane opening angle and an out-of-plane dihedral angle  
106 (Fig. 2b). The ATP-bound MreB monomer adopted a more open state, with an opening  
107 angle of  $\sim 92^\circ$  at the end of an 80-ns simulation, compared to the  $\sim 88^\circ$  opening angle of  
108 an ADP-bound MreB monomer (Fig. 2c, Fig. S1a). The dihedral angle was slightly  
109 smaller in an ATP-bound monomer than in an ADP-bound monomer (Fig. 2c, Fig. S1b),  
110 consistent with the larger dihedral angle in the crystal structure of CcMreB bound to  
111 ADP (PDB ID: 4CZL) versus CcMreB bound to AMP-PNP (PDB ID: 4CZM) (Fig. S1c).  
112 This result qualitatively differed from our previously reported MD simulations using  
113 TmMreB, in which ATP-bound TmMreB exhibited larger dihedral angle than ADP-bound

114 TmMreB but a similar opening angle<sup>19</sup>. To interrogate this difference, we performed new  
115 simulations using ATP-bound TmMreB, and obtained results consistent with our  
116 previous study (Fig. S1d,e)<sup>19</sup>. Therefore, although CcMreB and TmMreB are structurally  
117 similar, they likely adopt different conformations upon nucleotide binding. Such  
118 observations may relate to polymeric differences observed *in vitro*, wherein TmMreB  
119 formed straighter protofilaments on rigid lipid tubes than CcMreB<sup>5</sup>.

120

121 We next asked how MreB conformation *in silico* is affected by the MreB inhibitor S-(3, 4-  
122 dichlorobenzyl) isothioureia (A22) by performing MD simulations with MreB bound  
123 simultaneously to both ATP and A22 (Methods). Although A22 is known to perturb cell  
124 morphology *in vivo* by targeting the active site of MreB<sup>15,22</sup>, the molecular mechanism of  
125 action is still obscure. In our simulations, A22 did not affect the MreB monomer opening  
126 angle, and only slightly increased the dihedral angle (Fig. 2c). Thus, our results suggest  
127 that A22 does not directly affect MreB monomer conformation and is unlikely to alter the  
128 ATP-binding pocket, consistent with other studies proposing that A22 blocks phosphate  
129 release rather than inhibiting ATP hydrolysis<sup>5,23</sup>.

130

131 By contrast to the open conformation of an ATP-bound monomer, the (-) subunit in an  
132 ATP-bound MreB dimer maintained a closed conformation resembling the ADP-bound  
133 monomer (Fig. 2c), a conformation similar to subunits within a CcMreB protofilament  
134 crystal structure (Fig. S1c)<sup>5</sup>. We calculated opening and dihedral angles for all  
135 published CcMreB crystal structures<sup>5</sup>, and found that monomeric structures have larger

136 opening angles than polymerized structures (Fig. S1c), supporting our conclusion that  
137 polymerization closes MreB.

138

139 Motivated by previous findings relating MreB conformation to ATP-binding pocket  
140 stability<sup>19</sup>, we quantified ATP-binding pocket stability by calculating the buried solvent-  
141 accessible surface area (SASA) between MreB and ATP (Methods). Buried SASA  
142 quantifies the surface area of an ATP-MreB interface (Fig. S1f), and thus a larger buried  
143 SASA indicates a more stable ATP-binding pocket. The buried SASA in an ATP-bound  
144 CcMreB monomer decreased coincident with increases in opening angle (Fig. S1g,h),  
145 and ATP-A22-bound CcMreB and ATP-bound TmMreB exhibited similar decreases  
146 (Fig. S1g). By contrast, the (-) subunit of an ATP-bound CcMreB dimer maintained high  
147 buried SASA, indicating that its ATP-binding pocket remained stable. To verify that the  
148 buried SASA of ATP is related to the opening angle, we performed steered simulations  
149 of an ATP-bound CcMreB monomer in which we constrained the opening angle to the  
150 crystal structure value of  $\sim 89^\circ$ . Although the dihedral angle opened slightly in the  
151 steered simulation (Fig. S1a,b), the buried SASA of ATP remained high (Fig. S1g).  
152 Similarly, in our TmMreB monomer simulations, we observed a similar reduction in  
153 buried SASA when TmMreB opened (Fig. S1i). Taken together, our simulations suggest  
154 that CcMreB monomers adopt distinct open and closed conformations; ATP-bound  
155 CcMreB monomers prefer the open state but close upon polymerization. The closed  
156 state may facilitate ATP hydrolysis by increasing the stability of the ATP-binding pocket.

157

158 **Bending of an MreB single protofilament is nucleotide-dependent**



159 We next sought to study the conformational changes in single protofilaments with two  
160 CcMreB subunits (“2x1 protofilaments”) by analyzing the relative movements of the (+)  
161 and (-) subunits in the dimer (Fig. 2a,d). We simulated CcMreB 2x1 protofilaments with  
162 both subunits bound to ATP or ADP, and quantified their relative orientation changes by  
163 calculating the Euler angles that characterize the three orthogonal modes of rotation  
164 around the  $x$ ,  $y$ , and  $z$  axes (Fig. 2d(i)):  $\theta_1$  and  $\theta_2$  characterize bending into the  
165 membrane surface and inter-protofilament surface, respectively (Fig. 2d(ii, iii)), and  $\theta_3$   
166 characterizes twisting along the protofilament (Fig. 2d(iv)). We defined all three Euler  
167 angles to be zero in the crystal structure (Fig. 2d(i)). A stable membrane-binding  
168 double-protofilament conformation requires  $\theta_1$  to be negative and  $\theta_2$  to be approximately  
169 zero to avoid steric clashes (Fig. 2d(ii,iii)). We found that the largest changes in our  
170 simulations occurred in the bending angles (Fig. 2e, Fig. S1j,k), whereas no systematic  
171 protofilament twisting was observed (Fig. S1l). The bending angles were also  
172 nucleotide-dependent, with ATP-bound protofilaments exhibiting larger bending angles  
173 than ADP-bound protofilaments (Fig. 2e), consistent with our previously reported results  
174 in TmMreB<sup>19</sup>.

175

176 Considering the double protofilament structure and the membrane binding interface  
177 (Fig. 2d(ii,iii)), both bending angles observed in our 2x1 protofilament simulations are  
178 unlikely to occur in a double-protofilament architecture. A non-zero  $\theta_2$  would destabilize  
179 the inter-filament interface (Fig. 2d(iii)) and split the double protofilament. Positive  $\theta_1$   
180 corresponds to bending toward the membrane surface (Fig. 2d(ii)), whereas *in vitro*  
181 experiments indicate that MreB filaments bend away from the membrane<sup>5</sup>. Therefore,

182 although single-protofilament simulations demonstrate the molecule's capacity for  
183 nucleotide-dependent conformations, simulations of a double protofilament  
184 conformation and consideration of membrane binding are critical for revealing MreB  
185 structural dynamics that are relevant *in vivo*.

186

### 187 **ATP-bound MreB double protofilaments twist in a membrane-dependent fashion**

188 We next performed MD simulations of MreB double protofilaments, each containing four  
189 MreB doublets (a 4x2 protofilament, Fig. 3a). Simulations were performed with all MreB  
190 subunits bound to ATP or ADP (Fig. 3a,b, Methods), and at least two replicate  
191 simulations were performed for all systems. Similar to our analysis of 2x1 protofilaments  
192 (Fig. 2), we quantified the three Euler angles for neighboring doublet pairs in the double  
193 protofilaments. To minimize boundary effects, we first focused on the middle doublet  
194 (pair 2; Fig. 3a). As expected, bending of each protofilament was dramatically different  
195 in a double protofilament versus a single protofilament.  $\theta_1$  values were smaller in  
196 magnitude and were generally negative (Fig. S2a), indicating slight bending away from  
197 the membrane, and  $\theta_2$  decreased to approximately zero (Fig. S2b). Instead of bending  
198 along  $\theta_2$ , which would disrupt the symmetry and stability of a double protofilament,  
199 twisting ( $\theta_3$ ) was prominent in the double protofilament (Fig. 3c, Fig. S2c). In all 4x2  
200 protofilament simulations, left-handed twisting was observed. Interestingly, in water, an  
201 ATP-bound double protofilament twisted more ( $10.3 \pm 2.1^\circ$ , mean  $\pm$  S.D. from Gaussian  
202 fitting of last 40 ns of simulation) than an ADP-bound double protofilament ( $4.2 \pm 2.0^\circ$ ),  
203 suggesting that the difference in  $\theta_2$  bending between ATP- and ADP-bound single  
204 protofilaments was resolved into double protofilament twisting. To confirm that our

205 observations on bending and twisting were not artefacts due to limited filament size, we  
206 performed a larger simulation with eight ATP-bound MreB doublets in water (an 8x2  
207 protofilament). In this 60-ns simulation, changes in bending and twisting angles  
208 matched our observations in 4x2 protofilaments (Fig. S2d-f, Movie S1). To verify that  
209 the double-protofilament twist was not unique to CcMreB, we constructed a homology  
210 model of *E. coli* MreB (Methods), and found that EcMreB exhibited quantitatively similar  
211 left-handed twisting in simulation (Fig. S2g). Thus, higher-order oligomerization can  
212 dramatically alter the biophysical properties of MreB filaments.

213

214 A twisted double protofilament is not compatible with binding to a flat membrane. To  
215 address this incompatibility, we performed MD simulations of 4x2 protofilaments in the  
216 presence of a membrane patch (Fig. 3b). Membrane binding reduced twist in ATP-  
217 bound double protofilaments but did not affect the less-twisted ADP-bound structures  
218 (Fig. 3c). To test the hypothesis that membrane binding suppresses twisting in ATP-  
219 bound double protofilaments, we took the twisted protofilament structure from the end of  
220 an ATP-bound 4x2 protofilament simulation in water, and placed it ~10 Å away from a  
221 membrane patch. Within 120 ns, the filament untwisted from one end to the other (Fig.  
222 3d, Movie S2), effectively “zippering” into the membrane. The decrease in twist angle  
223 from each doublet was accompanied by an increase of buried SASA in the protein-  
224 membrane interface, indicative of stronger MreB-membrane interactions (Fig. 3e,f).  
225 Therefore, membrane binding directly suppresses twisting in ATP-bound MreB double  
226 protofilaments.

227

228 We further asked whether membrane binding alters the stability of the double  
229 protofilament conformation, as quantified by the distances between the interacting V118  
230 residues within each MreB doublet (Fig. S2h), which are essential for forming a double-  
231 protofilament structure<sup>5</sup>. For both ATP- and ADP-bound double protofilaments, our  
232 simulations in water exhibited increased distances between V118 residues in the first 60  
233 ns (Fig. S2i), suggesting a destabilized double protofilament interface. In contrast,  
234 membrane-associated simulations maintained short V118 distances (Fig. S2i),  
235 indicating more stable double protofilaments. Therefore, membrane binding potentially  
236 stabilizes the double-protofilament structure.

237

### 238 **Double protofilaments induce physiologically relevant membrane curvatures**

239 The distinct structures of MreB double protofilaments when bound or unbound to a  
240 membrane patch and the lack of complete untwisting when membrane-bound (Fig. 3c)  
241 indicated that membrane binding introduced strain into the MreB filaments that may  
242 affect membrane conformation. In our simulations, the membrane started flat, but after  
243 60 ns, the membrane bent toward the MreB protofilaments (Fig. 3g). In rod-shaped  
244 bacterial cells, the membrane also bends toward MreB filaments, forming a curvature  
245 dictated by the cell width (Fig. 4h). We computed the curvature at the center of the  
246 membrane patch along the protofilament direction and found that the membrane  
247 curvatures for all 4x2 protofilament membrane simulations were  $\sim 5 \mu\text{m}^{-1}$  (Fig. 3i), on the  
248 same scale as the membrane curvature of a rod-shaped bacterial cell that is  $\sim 0.8 \mu\text{m}$  in  
249 width ( $\sim 2.5 \mu\text{m}^{-1}$ ).

250

251 To validate that the observed membrane curvature changes were related to the twisted  
252 nature of 4x2 protofilaments, we performed simulations of 2x1 protofilaments in the  
253 presence of a membrane patch as a control. The membrane patches bound to 2x1  
254 protofilaments were more variable and did not exhibit a characteristic curvature  
255 throughout the simulation (Fig. S2j). Thus, only double MreB protofilaments induce  
256 stable and physiologically relevant curvature in the membrane, suggesting that MreB  
257 needs to form double protofilaments for its function *in vivo*.

258

### 259 **Mutation of MreB and binding of the regulatory protein RodZ modulate intrinsic** 260 **twist**

261 We hypothesized that since many MreB mutations alter cell shape, they potentially also  
262 induce altered intrinsic twist and membrane interactions as a double protofilament. We  
263 identified four MreB mutants that were reported to cause a range of alterations to *E. coli*  
264 cell shape, with the corresponding residues conserved between CcMreB and EcMreB:  
265 R124C<sup>24</sup>, E276D<sup>20</sup>, A55V<sup>14</sup>, and I141V<sup>14</sup>. The four mutated residues are spread across  
266 the MreB structure (Fig. 4a), and thus potentially alter MreB function in different  
267 manners.

268

269 We first performed all-atom MD simulations for each of the corresponding CcMreB  
270 mutants bound to ATP in a 4x2 protofilament configuration in water. All mutants  
271 exhibited similar bending (Fig. S3a,b), but differed widely in twisting angles compared to  
272 wild-type CcMreB: E275D (E276D in EcMreB) and R121C (R124C in EcMreB) twisted

273 less than wildtype, whereas V53A (V55A in EcMreB) and I138V (I141V in EcMreB)  
274 exhibited more twist (Fig. 4b, Fig. S3c).

275

276 We then asked whether these mutants also exhibit differential twisting when membrane-  
277 bound by simulating 4x2 protofilaments of R121C and V53A in proximity to a membrane  
278 patch. These two mutants were selected because they exhibited the smallest and the  
279 largest intrinsic twisting in our MD simulations in water, respectively (Fig. 4b). Despite  
280 the large differences in intrinsic twisting of these mutants in water, they behaved  
281 similarly when bound to a membrane, where twist angles were suppressed down to  
282 similar levels as wild-type MreB (Fig. S3d-f). Therefore, genetic perturbations can  
283 modulate the intrinsic twist of MreB double protofilaments without disrupting the ability  
284 of MreB to form stable membrane-binding complexes or to maintain rod-shaped growth.  
285 However, to untwist a highly twisted filament costs more energy compared to a less  
286 twisted filament, which potentially alters the conformation or orientation of membrane-  
287 bound MreB *in vivo*.

288

289 The membrane protein RodZ directly interacts with MreB<sup>25</sup> and is essential for rod-  
290 shape maintenance<sup>26</sup>. *E. coli* cells actively tune the stoichiometry of MreB and RodZ as  
291 a function of growth rate and growth phase<sup>20,27</sup>, and changes in the MreB:RodZ ratio  
292 alter the localization pattern of MreB and cellular dimensions<sup>20</sup>. We previously showed  
293 that RodZ binding and MreB mutations that complement the loss of rod-like shape in  
294  $\Delta rodZ$  cells both alter the mechanics of single TmMreB protofilaments *in vivo*<sup>20</sup>.  
295 Therefore, we hypothesized that RodZ binding also affects MreB double-protofilament

296 conformations. We constructed a homology model for the cytoplasmic tail of *C.*  
297 *crenscentus* RodZ from the co-crystal structure of *T. maritima* RodZ and MreB (PDB ID:  
298 2UWS)<sup>25</sup>, and aligned it to the RodZ-binding interface for each of the subunits in a 4x2  
299 CcMreB protofilament (Methods). We then performed all-atom MD simulations of the  
300 system in water, and found that while RodZ binding did not substantially change either  
301 of the bending angles in a double protofilament (Fig. S3g,h), it significantly reduced the  
302 twisting angle of MreB (Fig. 4c, Fig. S3i). As the ratio of MreB and RodZ in *E. coli* cells  
303 varies from ~10:1 to ~4:1 depending on growth conditions<sup>20</sup>, our simulations suggest  
304 that RodZ abundance actively regulates MreB filament conformation *in vivo*<sup>20</sup>.

305

306 Since MreB mutations and RodZ binding both alter the twisting of a MreB double  
307 protofilament, we further performed MD simulations for an MreB mutant (V53A) bound  
308 to the cytoplasmic tail of RodZ; the V53A 4x2 protofilament in the absence of RodZ  
309 exhibited the largest twisting in our simulations (Fig. 4b). Simulations of RodZ bound to  
310 a V53A 4x2 protofilament exhibited partially suppressed twisting (Fig. 4c, Fig. S3i), with  
311 an average twist slightly lower than that of wild-type MreB in the absence of RodZ (Fig.  
312 4c). The additivity of effects on twisting suggests that RodZ and MreB mutations can  
313 alter double protofilament twist in orthogonal manners. Therefore, although regulatory  
314 proteins are likely to modulate the intrinsic twisting in MreB double protofilaments, they  
315 likely shift the absolute twist but keep the order of twist angles across mutants.

316

317 **MreB twisting angle predicts filament-limit length and pitch angle *in vivo***

318 How does the intrinsic twist of MreB double protofilaments affect MreB conformation *in*  
319 *vivo*? To answer this question, we utilized a coarse-grained model<sup>28</sup> in which an MreB  
320 double protofilament is represented as a beam, with its bending and twisting stiffness  
321 extracted from our all-atom MD simulations (Methods). Considering that the large turgor  
322 pressure across the bacterial cell envelope ( $\sim 1 \text{ atm}^{29}$ ) forces the membrane to adopt a  
323 shape matching that of the cell wall, we treated the membrane as a rigid cylindrical  
324 surface. We calculated the Hamiltonian for an infinitely long MreB beam with intrinsic  
325 twist and bend<sup>28</sup>, and identified the local twist and bend angles that minimize its energy  
326 (Methods, Fig. 4d). Intuitively, in the presence of a binding interaction between the  
327 filament and the membrane, a twisted filament can gain binding energy by untwisting so  
328 that more of its membrane-binding interface can bind the membrane, but the untwisting  
329 process also accumulates bending and twisting energy. Therefore, competition between  
330 membrane binding and filament mechanics ultimately determines the minimal-energy  
331 conformation, which involves periodic flat (untwisted) domains along the filament that  
332 are bound to the membrane<sup>28</sup>. For an infinitely long filament, these flat regions are  
333 separated by short regions of unbinding that introduce a local twist of  $2\pi$  (Fig. 4e),  
334 relieving the accumulated twist energy. However, in a protein filament with a finite  
335 subunit-subunit interaction energy, it could be energetically more favorable to introduce  
336 a break in the filament rather than retain a twist wall between successive flat regions  
337 that cannot bind to the membrane. The energetic cost for breaking an MreB filament  
338 (i.e. eliminating two intrafilament monomer bonds) can be roughly estimated as the  
339 energy of hydrolyzing two ATP molecules ( $\sim 40 k_B T$ ). This cost can easily be  
340 compensated for by the ensuing membrane binding of the twist regions, as the twist



341 regions are generally tens of nm long (Fig. 4e) and contain ~40 MreB monomers, each  
342 with an affinity of  $\sim 10 k_B T^{30}$ . Thus, since it is energetically favorable for the twist walls to  
343 be absent, leaving only finite flat regions bound to the membrane, we predicted that  
344 MreB filament lengths *in vivo* are limited to be shorter than each flat domain.

345

346 The coarse-grained model predicts that the limit length of MreB filaments should  
347 decrease with increasing intrinsic twisting (Fig. 4f). Similarly, the local pitch angle  $\theta$  (Fig.  
348 4d) balances between filament bending and twisting: with a pitch angle of  $90^\circ$ , the  
349 filament fully untwists but largely preserves bending; when the pitch angle deviates from  
350  $90^\circ$ , the filament reduces bending while remaining somewhat twisted. Therefore, from  
351 an energetic point of view, our coarse-grained model predicts that the intrinsic twisting  
352 in an MreB filament (which we define to be 90% of the limit length) causes its orientation  
353 to deviate from the perfect circumferential direction (pitch angle  $\theta = 90^\circ$ ) (Fig. 4f). We  
354 further performed sensitivity analyses by altering the parameters that affect filament  
355 conformation<sup>28</sup>. For instance, by varying the intrinsic bending  $k$ , we find that the limit-  
356 length predictions are largely unaffected, whereas larger values of  $k$  lead to pitch angles  
357 closer to  $90^\circ$  (Fig. 4f). Similarly, altering the ratio of bending and twisting moduli ( $C/K$ )  
358 changes the pitch angle but not limit length (Fig. S3j), while decreasing membrane  
359 binding potential decreases the limit length without affecting the pitch angle (Fig. S3k).  
360 Notably, despite variation in the predicted values across parameters, our model  
361 generally predicts that larger intrinsic twist leads to short filaments with larger pitch  
362 angles.

363

364 To verify the results of our coarse-grained model, we experimentally constructed *E. coli*  
365 strains expressing the MreB mutants (Fig. 4a) with a sandwich fusion of monomeric  
366 super-folder green fluorescent protein (msfGFP)<sup>31</sup> as the sole copy of MreB. To quantify  
367 the shape and size of the MreB filaments, we imaged each strain using super-resolution  
368 structured illumination microscopy (Methods). In wild-type cells, MreB formed short  
369 filaments with a limit length of ~200-300 nm (Fig. 4g), approximately consistent with the  
370 prediction of our coarse-grained model (Fig. 4f). The E276D and R124C mutants clearly  
371 contained much longer filaments that spanned roughly half the cell periphery, whereas  
372 V55A and I141V had very short MreB filaments (Fig. 4g). We quantified the distribution  
373 of MreB patch areas in each mutant as a proxy for filament length, and indeed E276D  
374 and R124C had larger MreB patches than wildtype, and V55A and I141V had smaller  
375 patches (Fig. 4h). We used the 99<sup>th</sup> percentile of patch size as an approximation for  
376 filament limit length in each mutant, and found that it was highly negatively correlated  
377 with the twisting angles we observed in all-atom MD simulations (Fig. 4h, inset),  
378 consistent with our coarse-grained model. Similarly, we calculated the pitch angle of  
379 each MreB patch from the microscopy images (Fig. 4i) and observed that MreB filament  
380 orientation positively correlated with intrinsic twist (Fig. 4i, inset): a larger intrinsic twist  
381 led to a larger deviation from circumferential orientation. Taken together, our  
382 microscopy results validated the predictions of our coarse-grained model that the  
383 intrinsic twist of MreB double protofilaments affects filament limit length and orientation  
384 *in vivo*.

385

## 386 **Discussion**

387 Here, we used MD simulations to reveal a new twisted double-protofilament  
388 conformation of CcMreB (Fig. 3c) and EcMreB (Fig. S2g). We determined that twisting  
389 is regulated by various factors including the binding nucleotide (Fig. 3c), the membrane  
390 (Fig. 3c), genetic perturbations (Fig. 4b), and regulatory proteins (Fig. 4c). While  
391 previous MD simulations of TmMreB provided insights into the structural properties of  
392 MreB at the monomer and single-protofilament levels<sup>19,20</sup>, the twist only occurs with a  
393 double-protofilament structure. Using a coarse-grained model, we further linked the  
394 intrinsic twisting of MreB filaments to their size limit and orientation when bound to the  
395 membrane (Fig. 4e,f). Since EcMreB shares a higher sequence similarity with CcMreB  
396 (62%) than with TmMreB (52%), our MD studies in CcMreB also permit more versatile  
397 mutagenesis studies linking simulations to experimental measurements in *E. coli*, from  
398 which we validated our coarse-grained model *in vivo* with fluorescence measurements  
399 of MreB mutants predicted to have altered twist (Fig. 4g-i).

400

401 Twisting of MreB breaks symmetry and introduces chirality. Chirality is a common  
402 feature of biological systems: chiral asymmetry during embryogenesis ensures the  
403 normal function of the heart, gut, and brain<sup>33</sup>, the spirals of snail shells generally exhibit  
404 right-handed chirality<sup>34</sup>, and the tendrils in climbing plants also grow with specific  
405 chirality<sup>35</sup>. In bacterial growth, chirality has been observed at the population<sup>36</sup> and  
406 single-cell<sup>17,18</sup> levels, and can be altered by perturbing MreB or other components of the  
407 cell-wall synthesis machinery<sup>17</sup>. Our simulations have for the first time revealed a  
408 molecular-level mechanism for the origin of chirality (Fig. 3c), with handedness that is

409 consistent with that of single-cell twisting in *E. coli*<sup>17,18</sup>. Further understanding of the  
410 emergence of asymmetry and MreB twisting will benefit from recent advances in protein  
411 design<sup>37</sup>. The design of MreB mutants with various intrinsic twists can be directly tested  
412 *in vivo* to further probe the connections between molecular twisting and single-cell  
413 physiology. The observation that RodZ alters MreB twist (Fig. 4c) suggests that a host  
414 of other proteins that may similarly tune MreB conformation, whose expression may  
415 variably impact cell shape under various growth conditions. Further, general rules  
416 dictating filament twisting can be utilized to construct synthetic architectures in cells that  
417 have variable binding interfaces, mechanical properties, and, as we have shown for  
418 MreB, tunable lengths and orientations when bound to a membrane.

419

420 Much remains to be learned about the links among MreB, its regulatory partners, and  
421 cell-wall synthesis. Our prediction that binding of MreB double protofilaments induces  
422 physiologically relevant membrane curvature (Fig. 3g-i) is at least qualitatively  
423 consistent with electron microscopy of purified MreB bound to *in vitro* membranes<sup>21</sup>, and  
424 may be important for geometric localization of MreB<sup>8</sup>. The induced membrane  
425 curvatures are slightly larger than the curvature of bacterial cells, potentially due to the  
426 limited size of our simulation system and the lack of turgor pressure in our simulation.  
427 While *in vitro* assays of MreB's interaction with the membrane are challenging due to its  
428 N-terminal amphiphilic helix, further coarse-grained approaches incorporating the  
429 mechanical properties of the membrane and turgor pressure will further broaden our  
430 understanding of MreB's role in geometric sensing and cell-shape determination. While  
431 previous models have studied how MreB orientation is related to filament

432 mechanics<sup>30,38</sup>, they have either assumed a non-twisted filament conformation<sup>30</sup>, or  
433 neglected the fact that membrane binding only occurs on a specific side of the  
434 filament<sup>38</sup>. Therefore, our coarse-grained model provides a more comprehensive view of  
435 MreB mechanics and ultrastructure.

436

437 Beyond MreB, many other bacterial actin homologs such as FtsA, ParM, and MamK  
438 also polymerize into filaments. While these proteins have diverse roles in bacteria, our  
439 study suggests that nucleotide binding and protein-protein interactions may generally  
440 induce conformational changes in these polymers whose discovery can be accelerated  
441 with MD simulations. Despite their common structural homology to actin, these proteins  
442 exhibit diverse protofilament architectures<sup>39</sup>, which may reflect their varied physiological  
443 roles from cell division to plasmid segregation. That binding of RodZ or genetic  
444 mutations in MreB altered or even reversed chirality (Fig. 4e,h) reflects remarkable  
445 flexibility in the intrafilament interface of MreB, wherein single mutations can exert  
446 enormous impact on mesoscopic filament conformation and cell shape. Chirality  
447 reversal in mammalian cells distinguishes cancerous cells from normal cells, and such  
448 chirality is dependent on the functionality of the actin cytoskeleton<sup>40</sup>. Moreover,  
449 modulation of chirality is not limited to the actin family: single mutations can also  
450 introduce twist to filaments of the bacterial tubulin homolog FtsZ, resulting in growth  
451 along a helical pattern rather than a ring<sup>41</sup>. Thus, understanding the molecular origin of  
452 chirality in cytoskeletal filaments has broad implications for studying chiral  
453 morphogenesis and identifying potential factors that alter or reverse chirality.

454

455 **Figure Legends**

456

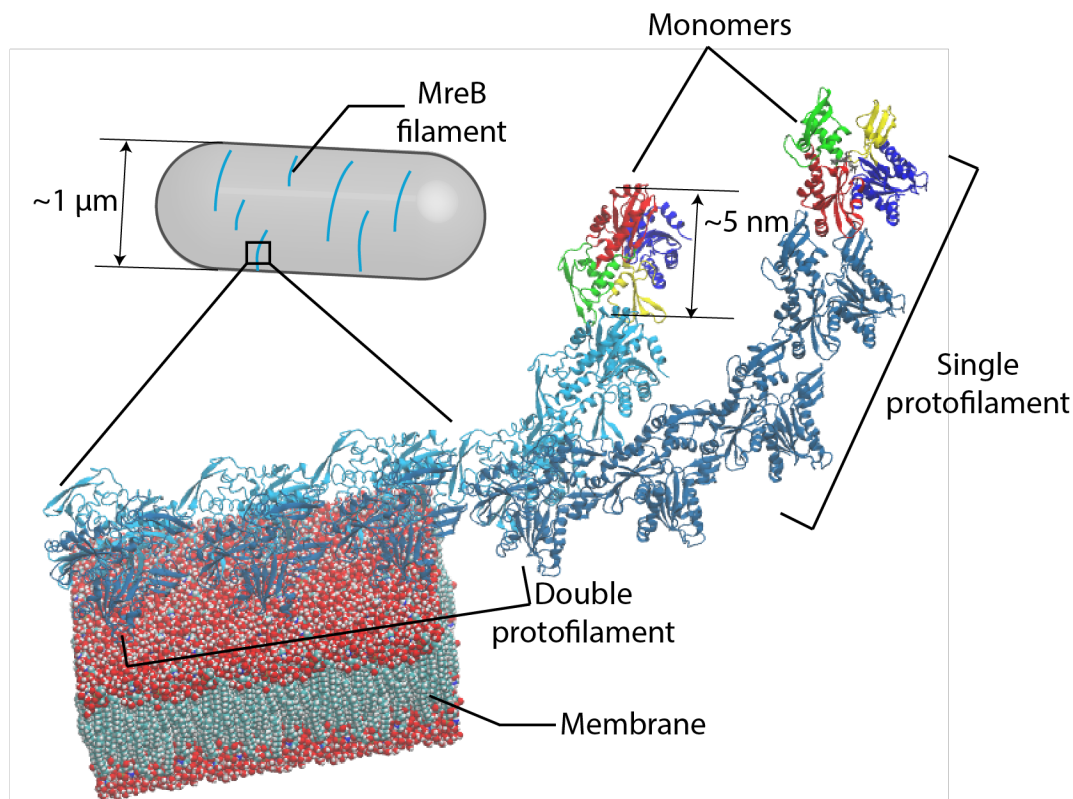

457

458 **Figure 1: Assembly of MreB protofilaments.** MreB monomers first polymerize into  
459 single protofilaments. Next, two antiparallel single protofilaments assemble into a  
460 double protofilament, with membrane-binding domains on the same side of the double  
461 protofilament<sup>5</sup>. Inside bacterial cells, short MreB filaments bind the inner face of the  
462 plasma membrane, align approximately circumferentially, and rotate around the long  
463 cell axis to guide cell-wall insertion and to determine rod-like shape and size.

464

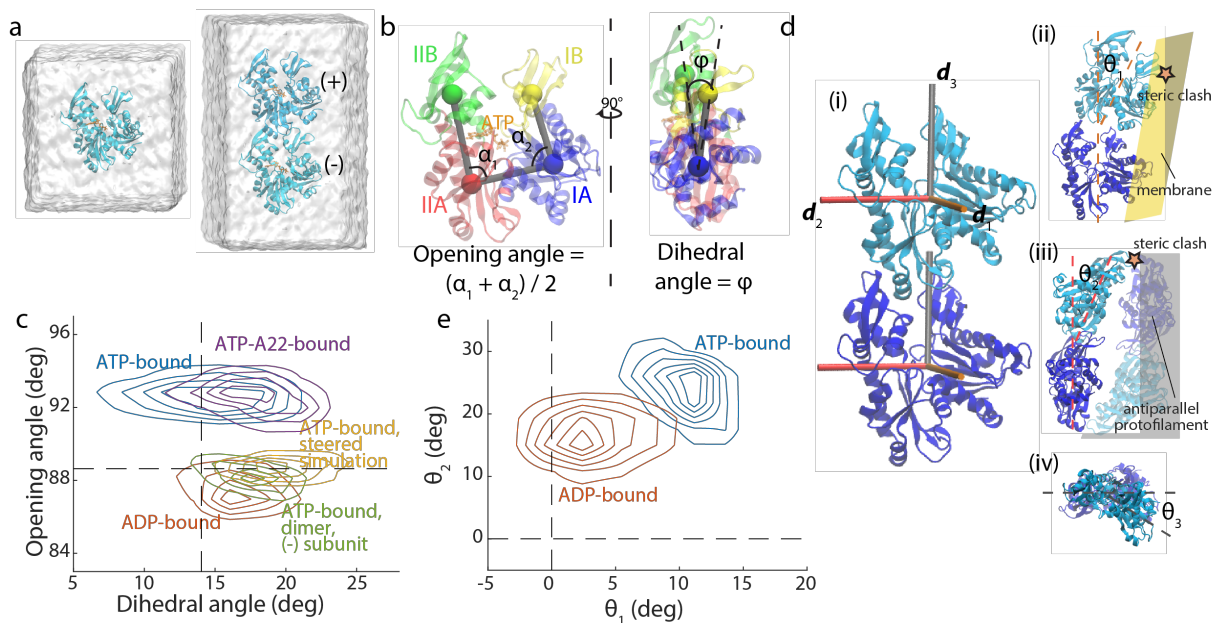

465

466 **Figure 2: MreB monomer and dimer conformations are nucleotide-dependent.**

467 a) Simulated systems of an MreB monomer (left) and a single protofilament with two  
 468 subunits (“2x1 protofilament”, right). Each MreB subunit is bound to a nucleotide,  
 469 with the whole system surrounded by a water box. In the 2x1 single  
 470 protofilament, we refer to the top and bottom MreB subunits as the (+) and (-)  
 471 subunits, respectively.

472 b) Definitions of opening angle and dihedral angle for an MreB monomer, with the  
 473 centers-of-mass of the four subdomains shown as colored spheres.

474 c) Contour density plot of the distributions of opening and dihedral angles for each  
 475 simulation system from the last 40 ns of the simulation. MreB subunits essentially  
 476 adopted one of two conformations in simulations. ATP-bound MreB monomers  
 477 exhibited large opening angles in the presence (purple) and absence (blue) of  
 478 A22, while an ADP-bound monomer (red) and the (-) subunit of an ATP-bound  
 479 dimer (green) had smaller opening angles. Steering of the opening angle of an

480 ATP-bound monomer to its value in the crystal structure (yellow) mimicked the  
481 conformation of an ADP-bound monomer. Dashed lines denote the values of the  
482 opening and dihedral angles in the crystal structure (PDB ID: 4CZF).

483 d) (i) An MreB dimer from a single protofilament, with three axes overlaid on each  
484 subunit that were used to compute the degree of bending and twisting between  
485 them. (ii) Illustration of  $\theta_1$ , with positive  $\theta_1$  denoting bending toward the  
486 membrane surface (yellow). Positive  $\theta_1$  leads to a steric clash with the membrane  
487 surface. (iii) Illustration of  $\theta_2$ , with positive  $\theta_2$  denoting bending toward the inter-  
488 protofilament interface. The paired antiparallel protofilament is shown in semi-  
489 transparency. Positive  $\theta_2$  leads to a steric clash with the paired protofilament. (iv)  
490 Illustration of  $\theta_3$  from the top of a protofilament, with positive  $\theta_3$  denoting left-  
491 handed twisting.

492 e) Contour density plot for the distributions of  $\theta_1$  and  $\theta_2$  from the last 40 ns (200  
493 frames) of the simulations, with both ATP- and ADP-bound single protofilaments  
494 bending toward the membrane side and toward the inter-protofilament interface.  
495 An ATP-bound single protofilament exhibited more substantial bending in both  
496 directions than an ADP-bound single protofilament. Dashed lines denote the  
497 respective angles in the crystal structure.

498



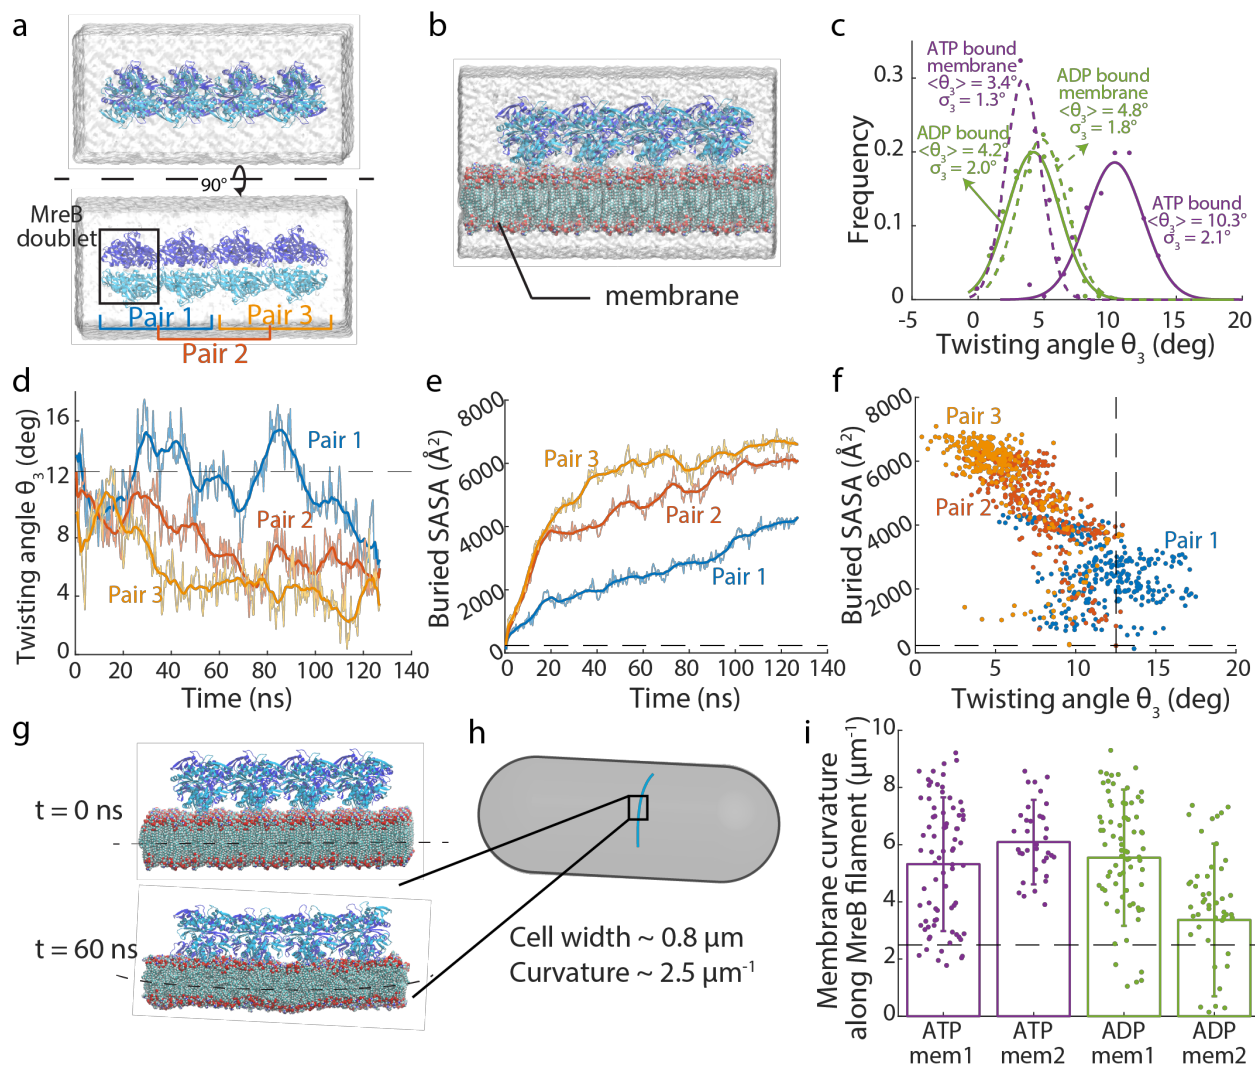

499

500 **Figure 3: Binding of an MreB double protofilament to the membrane decreases**  
 501 **MreB twist and induces membrane curvature.**

502 a) Simulated system of a 4x2 MreB double protofilament in water. The system  
 503 consists of four MreB doublets (eight subunits), surrounded by a water box.  
 504 b) Simulated system of a 4x2 MreB double protofilament bound to a membrane.  
 505 The MreB protofilament was placed near a membrane patch, with the  
 506 membrane-binding side of the double protofilament (with subdomains IA and IB)

507 facing the membrane patch. The spaces on the top and bottom of the membrane  
508 patch not occupied by MreB were filled with water.

509 c) Distribution of twisting angles in simulated systems at equilibrium. At the start of  
510 the simulations, all systems had zero twisting. The ATP-bound 4x2 protofilament  
511 displayed a large twisting angle, which was reduced when the 4x2 protofilament  
512 bound the membrane. Membrane binding did not substantially affect the twisting  
513 angle of ADP-bound protofilaments. Solid dots are histograms from the last 40 ns  
514 (200 frames) of each simulation, and curves are Gaussian fits of the histograms.  
515 The mean and standard deviation for each Gaussian fit are also indicated.

516 d) Twisting angles lessened over time when a pre-twisted 4x2 protofilament was  
517 placed close to a membrane patch. Untwisting occurred first in Pair 3, then  
518 propagated to Pair 2 and Pair 1. The dashed line shows the initial twisting angle  
519 in Pair 2.

520 e) Buried SASA of the membrane-binding interface for the twisted protofilament.  
521 Higher buried SASA indicates stronger membrane interaction. Similar to the  
522 changes in twisting angles, the buried SASA increased first in Pair 3, then in Pair  
523 2 and Pair 1. The dashed line is the initial buried SASA for Pair 2.

524 f) Scatter plot of buried SASAs and twisting angles in the simulation analyzed in  
525 (d,e). Each dot represents the values for a certain Pair at a particular time point,  
526 and dashed lines are the initial values for Pair 2. Buried SASA and twisting angle  
527 were highly correlated (Pearson's  $r = 0.79$ ,  $p < 10^{-10}$ , Student's  $t$ -test).

528 g) In a typical membrane simulation with 4x2 protofilaments, the membrane started  
529 flat (top) and ended up curved toward MreB (bottom).

- 530 h) MreB filament orientation inside a bacterial cell. MreB binds the inner face of the  
531 cytoplasmic membrane, with the membrane curving toward MreB filaments.
- 532 i) Values of induced membrane curvature in 4x2 protofilament simulations are  
533 comparable with *in vivo* membrane curvatures. The dashed line represents the *in*  
534 *vivo* reference value for a rod-shaped cell with width 0.8  $\mu\text{m}$ . Data points  
535 represent the mean  $\pm$  standard deviation for the last 40 ns of each simulation.
- 536

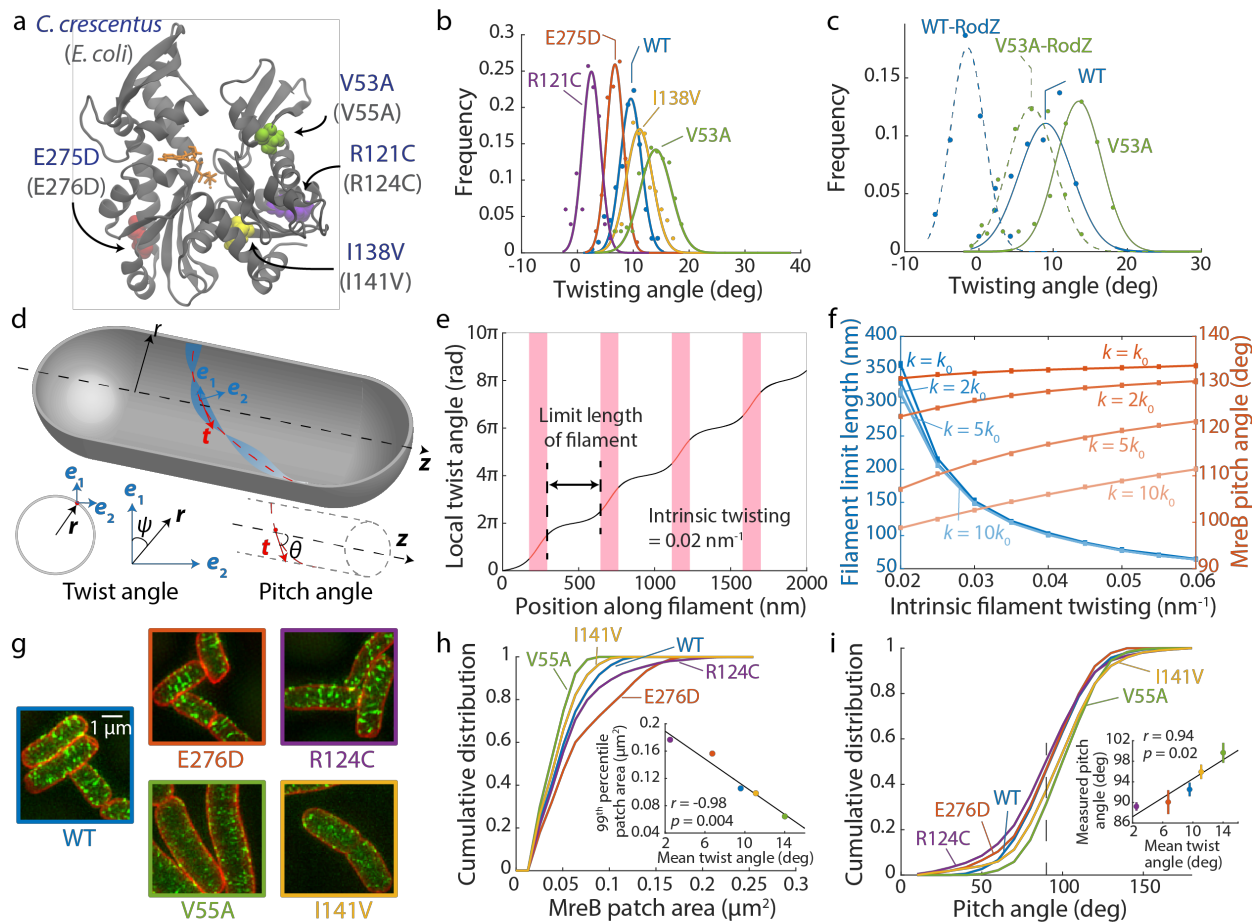

537

538 **Figure 4: MreB twisting angle predicts MreB filament limit length *in vivo*.**

- 539 a) Mutations in MreB investigated via MD simulations mapped onto the CcMreB  
 540 crystal structure. These mutations were previously identified to alter cell  
 541 shape<sup>14,20</sup>, and are conserved between CcMreB (residue numbers in blue) and  
 542 EcMreB (residue numbers in light gray). Colored spheres: mutated residues.  
 543 Orange: ATP molecule. Gray: MreB protein structure.
- 544 b) Distributions of twisting angles in simulations of CcMreB mutants. All systems  
 545 started with zero twisting. E275D and R121C twisted less than wild-type MreB,  
 546 while V53A and I138V twisted more. Dots are histograms from the last 40 ns of  
 547 each simulation, and curves are Gaussian fits of the histograms.

- 548 c) Distributions of twisting angles with and without RodZ binding. For wildtype and  
549 the V53A mutant, binding of the cytoplasmic tail of RodZ decreased twisting. The  
550 effect of RodZ binding was approximately additive to the effects of MreB  
551 mutation, such that the V53A-RodZ system twisted more than the WT-RodZ  
552 system. Dots are histograms from the last 40 ns of each simulation, and curves  
553 are Gaussian fits of the histograms.
- 554 d) Schematic of our coarse-grained model. The MreB filament (blue) is bound to the  
555 inside of a cylindrical cell body (gray) with radius  $r$ . The centerline of the filament  
556 is drawn in red, with  $\mathbf{t}$  being the tangent vector.  $\mathbf{e}_1$  and  $\mathbf{e}_2$  are the material frame  
557 coordinates along the filament. Local twisting angle  $\psi$  is defined as the angle  
558 between  $\mathbf{e}_1$  and the unit vector  $\mathbf{r}$ . Local pitch angle  $\theta$  is defined as the angle  
559 between tangent vector  $\mathbf{t}$  and the cylindrical centerline.
- 560 e) The coarse-grained model predicts that when a filament with a given intrinsic  
561 twist bound to a cylindrical membrane, the filament forms flat domains (black  
562 lines) interspaced with twisted  $360^\circ$  turns (red lines in pink shading). It is  
563 energetically favored for the filament to break at the twisted regions and thereby  
564 form only flat fragments, so we predict that the extent of a flat domain sets the  
565 limit length of a membrane-bound filament.
- 566 f) The coarse-grained model predicts that filaments with larger intrinsic twisting  
567 have shorter limit length. Similarly, the coarse-grained model predicts that the  
568 orientation of a short filament (90% of the corresponding limit length) deviates  
569 more from  $90^\circ$  as the intrinsic twist increases. Increasing the intrinsic bending  $k$   
570 did not affect the limit length, but reduced the pitch angle to be closer to  $90^\circ$ .

571 Data points are mean  $\pm$  standard error of the mean from 20 independent Monte  
572 Carlo simulations, and the smoothed curves are fit to a third-order polynomial as  
573 a guide to the eye. For most data, the error bars are small and overlap with the  
574 data points.

575 g) Structured illumination microscopy of wildtype and the four EcMreB mutants  
576 constructed in *E. coli* cells with a sandwich fusion of msfGFP to MreB. Images  
577 are maximum projections of a z-stack, with red (membrane dye FM 4-64FX) and  
578 green (MreB-msfGFP) channels merged.

579 h) The cumulative distributions of MreB-msfGFP fluorescence patch sizes for each  
580 strain trend with the twisting angles in (b). The V55A and I141V strains had  
581 smaller patch sizes than wildtype, and E276D and R124C strains contained  
582 larger patches. MreB patches were defined as continuous regions with high  
583 msfGFP signal on the cylindrical cell body with area larger than the diffraction  
584 limit.  $n > 1,000$  patches were measured for each strain. Inset: the 99<sup>th</sup> percentile  
585 of patch area in each strain was highly correlated with the mean twist angle from  
586 (b) (Pearson's  $r = -0.98$ ,  $p = 0.004$ , Student's  $t$ -test,  $n = 5$  strains), providing  
587 experimental validation of the coarse-grained model.

588 i) Cumulative distributions of MreB filament pitch angle. The V55A and I141V  
589 strains had larger pitch angles than wildtype, while E276D and R124C had  
590 smaller pitch angles that were closer to  $90^\circ$ . The pitch angle was defined as the  
591 angle between the main axis of each fluorescent patch and the long axis of the  
592 cell. Inset: the experimentally measured pitch angle highly correlated with the  
593 mean twist angle from (b) (Pearson's  $r = 0.94$ ,  $p = 0.02$ , Student's  $t$ -test,  $n = 5$

594 strains). Data points are mean  $\pm$  standard error of the mean for  $n > 1,000$   
595 patches in each strain.

## 596 **Methods**

597

### 598 **Equilibrium MD simulations**

599 All simulations were performed using the MD package NAMD<sup>42</sup> with the CHARMM36  
600 force field<sup>43</sup>, including CMAP corrections<sup>44</sup>. Water molecules were described with the  
601 TIP3P model<sup>45</sup>. Long-range electrostatic forces were evaluated by means of the  
602 particle-mesh Ewald summation approach with a grid spacing of  $<1$  Å. An integration  
603 time step of 2 fs was used<sup>46</sup>. Bonded terms and short-range, non-bonded terms were  
604 evaluated every time step, and long-range electrostatics were evaluated every other  
605 time step. Constant temperature ( $T = 310$  K) was maintained using Langevin  
606 dynamics<sup>47</sup>, with a damping coefficient of  $1.0 \text{ ps}^{-1}$ . A constant pressure of 1 atm was  
607 enforced using the Langevin piston algorithm<sup>48</sup> with a decay period of 200 fs and a time  
608 constant of 50 fs. Setup, analysis, and rendering of the simulation systems were  
609 performed with the software VMD<sup>49</sup>. Steering of the opening angle was achieved by  
610 introducing collective forces to constrain the angle to defined values through the  
611 collective variable functionality of NAMD<sup>42</sup>.

612

### 613 **Simulated systems**

614 MD simulations performed in this study are described in Table S1. Unless otherwise  
615 noted, systems were initialized from the crystallographic structure of *C. crescentus*  
616 MreB bound to magnesium and ADP (PDB ID: 4CZF)<sup>5</sup>. The bound nucleotide was  
617 replaced by ATP or ADP with chelating  $\text{Mg}^{2+}$  ions for all simulated systems. In  
618 simulations including a membrane, patches consisting of phosphatidylethanolamine



619 (POPE) were generated using the membrane plugin in VMD. Water and neutralizing  
620 ions were added around each simulated system, resulting in final simulation sizes of up  
621 to 480,000 atoms. For mean values and distributions of measurements, only the last 40  
622 ns were used for each simulation. All simulations were run until equilibrium was reached  
623 unless specified in the text. To ensure simulations had reached equilibrium,  
624 measurement distributions were fit to a Gaussian.

625

### 626 **Analysis of dihedral and opening angles**

627 The centers-of-mass of the four subdomains of each protein subunit were obtained  
628 using VMD, excluding the amphiphilic helix (residues 1 to 8). For each time step, we  
629 calculated one opening angle from the dot product between the vector defined by the  
630 centers-of-mass of subdomains IIA and IIB and the vector defined by the centers-of-  
631 mass of subdomains IIA and IA. Similarly, we calculated a second opening angle from  
632 the dot products between the vectors defined by the centers-of-mass of subdomains IA  
633 and IB and of subdomains IA and IIA. The opening angles we report are the average of  
634 these two opening angles (Fig. 2b, left). The dihedral angle was defined as the angle  
635 between the vector normal to a plane defined by subdomains IA, IB, and IIA and the  
636 vector normal to a plane defined by subdomains IIB, IIA, and IA (Fig. 2b, right).

637

### 638 **Calculation of bending and twisting angles in single and double protofilaments**

639 At each time step of a simulation, the coordinate system of the bottom and top subunits  
640 (or each subunit pair) was defined using three unit vectors ( $\mathbf{d}_1$ ,  $\mathbf{d}_2$ ,  $\mathbf{d}_3$ )<sup>50</sup>. For single  
641 protofilaments,  $\mathbf{d}_3$  approximately aligns to the center of mass between the two subunits,

642  $\mathbf{d}_2$  is defined to be perpendicular to the membrane plane, and  $\mathbf{d}_1 = \mathbf{d}_3 \times \mathbf{d}_2$  (Fig. 2d). The  
643 same definitions for the unit vectors were used for double protofilaments. The rotation  
644 angle around  $\mathbf{d}_3$  ( $\theta_3$ ) represents twist between the bottom and top subunits (or subunit  
645 pair). Similarly, rotations around  $\mathbf{d}_2$  and  $\mathbf{d}_1$  ( $\theta_2$  and  $\theta_1$ ) represent bending parallel to the  
646 membrane plane and bending toward the membrane plane, respectively (Fig. 2d).

647

### 648 **A22 force field generation**

649 The A22 structure was isolated from PDB ID 4CZG using UCSF chimera<sup>51</sup> by removing  
650 all other molecules and adding missing hydrogens in the original PDB file. The force  
651 field file for A22 was generated using SwissParam with default parameters<sup>52</sup>.

652

### 653 **Calculation of buried solvent-accessible surface area (SASA)**

654 The interaction strength between two interacting molecules was estimated by  
655 calculating the contact surface area between them, which can be approximated by  
656 measuring the surface area buried between the two molecules that is not accessible to  
657 solvent when the molecules interact. This surface area is known as the buried SASA.  
658 The buried SASA between two molecules can be calculated from three quantities: the  
659 SASA of each molecule by itself (denoted as  $A_1$  and  $A_2$ ), and the SASA of the complex  
660 of the two molecules when interacting (denoted as  $A_{1+2}$ ). If the molecules are in contact,  
661 then the sum of the SASA of each molecule is greater than the SASA for both  
662 molecules together, and the contact area is the difference between the two values  
663 divided by two (to account for double counting):

$$664 \text{ buried SASA} = (A_1 + A_2 - A_{1+2})/2.$$

665

## 666 **Construction of homology models for *E. coli* MreB and *C. crescentus* RodZ**

667 Homology models were constructed using the software MODELLER<sup>53</sup>. Using MreB as  
668 an example, the amino acid sequences of EcMreB and CcMreB were aligned using the  
669 UniProt website (<http://www.uniprot.org/align/>). The alignment results and the PDB file  
670 with the CcMreB crystal structure were processed by MODELLER to generate 10  
671 homology models. The homology model with the lowest DOPEHR score was used for  
672 MD simulations.

673

## 674 **Calculation of membrane patch curvature in simulations**

675 The positions of each phosphate atom in the top layer of the membrane (the layer that  
676 directly interacts with MreB) were extracted and fit to a second-order polynomial. The  
677 curvature of the membrane patch was defined as the curvature at the center of the fitted  
678 surface.

679

## 680 **Coarse-grained simulations**

681 The Hamiltonian of the filament is<sup>28</sup>

$$682 \quad H = \frac{1}{2} \int_0^L ds \left[ C \left( \frac{\sin^2 \theta}{r^2} - k_0 \right)^2 + C (\theta')^2 + K \left( \psi' - \frac{\sin 2\theta}{2r} - \omega_0 \right)^2 + V \sin^2 \left( \frac{\psi}{2} \right) \right],$$

683 where  $L$  is the total length of the filament,  $\theta$  and  $\psi$  are the local tilt and twist angles,  
684 respectively,  $r$  is radius of the cell,  $C$  is the bending modulus of the filament,  $K$  is the  
685 torsional modulus,  $V$  is the membrane binding potential, and  $k_0$  and  $\omega_0$  are the intrinsic  
686 bending and twisting of the filament, respectively. Parameter values are listed in Table  
687 S2.

688

689 The total energy per unit length was minimized for an infinite-length filament bound to  
690 an infinitely long cylinder by searching for solutions that are periodic over an arc  
691 distance  $l$ . The boundary conditions were set to be

$$692 \quad \psi(0) = 0, \psi(l) = 2\pi.$$

693 The Hamiltonian was then minimized with respect to  $\theta$ ,  $\psi$ , and  $l$ , yielding both the  
694 equilibrium period  $l$  and the equilibrium filament shape described by  $\theta$  and  $\psi$ .

695

696 The energy was computed by discretizing the Hamiltonian into  $N$  segments, with each  
697 segment  $i$  able to adopt a distinct bending and twisting conformation described by  
698 angles  $\theta_i$  and  $\psi_i$ . The discretized Hamiltonian was used to calculate the total energy of  
699 the filament as

$$700 \quad E = \frac{1}{2} \sum_{i=1}^N \left[ C \left( \frac{\overline{\sin^2 \theta_{i,i+1}}}{r^2} - k_0 \right)^2 + C (\Delta\theta_{i,i+1})^2 + K \left( \Delta\psi_{i,i+1} - \frac{\overline{\sin 2\theta_{i,i+1}}}{2r} - \omega_0 \right)^2 \right. \\ 701 \quad \left. + V \sin^2 \left( \frac{\overline{\psi_{i,i+1}}}{2} \right) \right],$$

702 where  $\overline{\theta_{i,i+1}}$  and  $\overline{\psi_{i,i+1}}$  are the average tilt and twist angles between nearest neighbor  
703 segments, and  $\Delta\theta_{i,i+1}$  and  $\Delta\psi_{i,i+1}$  are the differences in tilt and twist angles between  
704 nearest neighbor segments. A classical Metropolis Monte Carlo algorithm was used to  
705 minimize the energy of the system. Specifically, for each  $l$ , starting from an initial  
706 configuration of  $\theta = 90^\circ$  and  $\psi' = 2\pi/l$ , each Monte Carlo step  $t$  altered  $\theta_i$  or  $\psi_i$  to change  
707 the filament conformation from  $\mathbf{z}^t$  to a trial conformation  $\mathbf{z}'$ . The new conformation  $\mathbf{z}^{(t+1)}$   
708 was determined using the Metropolis algorithm:

709  $z^{t+1} =$

710  $\begin{cases} z' \text{ with probability } p = e^{-(E(z')-E(z^t))/k_B T} \text{ or } z^t \text{ with probability } 1-p, \text{ if } E(z') > E(z^t). \\ z', \text{ if } E(z') \leq E(z^t) \end{cases}$

711 Results were assessed to have converged after  $\sim 10^7$  Monte Carlo steps, as defined by  
712 energy fluctuations lower than 1% of the minimized energy across the last  $10^4$  steps.

713 The corresponding period  $l$  leading to the minimized energy was identified using a  
714 Golden-section search. Twenty independent replicate simulations were carried out for  
715 each parameter set to ensure that a global minimum was reached.

716

### 717 **Estimation of parameters for coarse-grained modeling**

718 The bending and torsional moduli of MreB filaments were estimated from the variance  
719 of the appropriate simulations. For the torsional modulus  $K$ , the standard deviation,  $\sigma$ , of  
720 the fluctuations in the twist angle from 4x2 protofilament simulations was  $\sim 1.88^\circ$  per  
721 monomer length. From this value, the torsional rigidity can be estimated as  $K =$   
722  $k_B T \Delta l / \sigma^2$ , where  $\Delta l \sim 5$  nm is the length of an MreB monomer. This estimate gives  $K \sim$   
723  $4.6 \times 10^3 k_B T$  nm. The bending modulus  $C$  can be estimated similarly. Genetic mutations  
724 in MreB did not substantially alter  $K$  or  $C$ . The membrane-binding potential of each  
725 MreB monomer was estimated to be  $10 k_B T$  in a previous study<sup>30</sup>, yielding  $V = 4 k_B T/\text{nm}$   
726 for a double protofilament. See Table S2 for a list of all parameters used in our coarse-  
727 grained simulations.

728

### 729 **Strains and media**

730 Strains used in this study are listed in Table S3. All strains were grown with aeration at  
731  $37^\circ \text{C}$  in LB medium (10 g/L tryptone, 5 g/L yeast extract, and 5 g/L NaCl).

732

733 **Sample preparation and imaging for structured illumination microscopy**

734 Saturated overnight cultures were back-diluted 1:200 into pre-warmed fresh LB and  
735 grown at 37 °C with shaking. The cultures were further diluted 1:10 into pre-warmed  
736 fresh LB at 60 min and 150 min after the first dilution, respectively. By 220 min, the  
737 cultures reached exponential growth with OD~0.1. One milliliter of the cells was fixed in  
738 phosphate-buffered saline containing 3% glutaraldehyde/3% paraformaldehyde  
739 (Electron Microscopy Sciences) at room temperature for 15 min, with 1 µg/mL FM 4-  
740 64FX membrane stain (Invitrogen) added during fixation. Cells were washed three times  
741 in cold phosphate-buffered saline, and 1 µL of the cell solution was pipetted onto a No.  
742 1.5 coverslip (Zeiss) coated with poly-L-lysine solution (Sigma-Aldrich). After the droplet  
743 dried, a small drop of ProLong Diamond AntiFade Mountant (Thermo Fisher) was added  
744 on top of the dried droplet, and the coverslip was mounted on a glass slide (VWR) and  
745 sealed with VALAP (equal parts Vaseline, lanolin, and paraffin by weight).

746

747 Cell samples were imaged on an OMX V4 microscope platform (GE Life Sciences) with  
748 a 100X (NA 1.42) oil-immersion objective (Nikon Instruments). Images from two  
749 channels were collected on two Evolve 512 electron-multiplying charged couple device  
750 cameras (Photometrics) using DeltaVision microscopy imaging system v. 3.70 (GE Life  
751 Sciences).

752

753 **Image analysis for structured illumination microscopy**

754 Raw images were reconstructed and aligned into 3D z-stacks using SoftWoRx v. 6.5.2  
755 (GE Life Sciences). The middle plane for each z-stack was segmented by the FM 4-  
756 64FX signal using *Morphometrics*<sup>54</sup> to obtain individual cell contours. For each contour,  
757 a coordinate-system mesh was calculated using the pill mesh function from  
758 *MicrobeTracker*<sup>55</sup>. A three-dimensional surface was reconstructed from the  
759 segmentation mesh assuming rotational symmetry about the central axis, and MreB  
760 patches localized near the cell periphery were identified from the GFP channel based  
761 on intensity, with patches smaller than the diffraction limit for structured illumination  
762 microscopy ( $\sim 0.02 \mu\text{m}^2$ ) excluded from quantification.  
763

764 **Supplementary Information**

765 The supplementary information contains 3 figures, 3 tables, and 2 movies.

766

767 **Acknowledgments**

768 The authors thank the Huang lab and Zemer Gitai for helpful discussions. This work  
769 was supported in part by an Agilent Graduate Fellowship and a Stanford  
770 Interdisciplinary Graduate Fellowship (to H.S.), National Science Foundation (NSF)  
771 grant DMS-1616926 (to A.G.), NSF CAREER Award MCB-1149328, NIH Director's New  
772 Innovator Award DP2-OD006466, and the Allen Discovery Center at Stanford University  
773 on Systems Modeling of Infection (to K.C.H.). K.C.H. is a Chan Zuckerberg Biohub  
774 Investigator. AG and DQ were supported by the NSF-CREST: Center for Cellular and  
775 Bio-molecular Machines at UC Merced (NSF-HRD-1547848). The authors also  
776 acknowledge the hospitality of the Aspen Center for Physics, which is supported by  
777 NSF grant PHY-1607611. Structured illumination microscopy in this study was  
778 supported, in part, by Award Number 1S10OD01227601 from the National Center for  
779 Research Resources. The contents of this study are solely the responsibility of the  
780 authors and do not necessarily represent the official views of the National Center for  
781 Research Resources or the National Institutes of Health.

782

783 **Author Contributions**

784 H.S. and K.C.H. conceptualized the study. H.S., D.Q., A.G., and K.C.H. designed the  
785 experiments. H.S. and D.Q. performed simulations. H.S. created strains, carried out



786 imaging experiments, and analyzed the data. H.S. and K.C.H. wrote the manuscript. All  
787 authors reviewed the manuscript prior to submission.

788

### 789 **Data Availability**

790 The datasets generated during the current study are available from the corresponding  
791 author on reasonable request.

792

### 793 **Author Information**

794 The authors have no competing financial interests. Correspondence and requests for  
795 materials should be addressed to [kchuang@stanford.edu](mailto:kchuang@stanford.edu).

796

797 **References**

- 798 1 Van Teeffelen, S. *et al.* The bacterial actin MreB rotates, and rotation depends on  
799 cell-wall assembly. *Proceedings of the National Academy of Sciences* **108**,  
800 15822-15827 (2011).
- 801 2 Adams, D. W. & Errington, J. Bacterial cell division: assembly, maintenance and  
802 disassembly of the Z ring. *Nature Reviews Microbiology* **7**, 642-653 (2009).
- 803 3 Szwedziak, P., Wang, Q., Freund, S. M. & Löwe, J. FtsA forms actin-like  
804 protofilaments. *The EMBO journal* **31**, 2249-2260 (2012).
- 805 4 Gayathri, P. *et al.* A bipolar spindle of antiparallel ParM filaments drives bacterial  
806 plasmid segregation. *Science* **338**, 1334-1337 (2012).
- 807 5 Van den Ent, F., Izoré, T., Bharat, T. A., Johnson, C. M. & Löwe, J. Bacterial  
808 actin MreB forms antiparallel double filaments. *Elife* **3**, e02634 (2014).
- 809 6 Holtje, J. V. Growth of the stress-bearing and shape-maintaining murein sacculus  
810 of *Escherichia coli*. *Microbiol Mol Biol Rev* **62**, 181-203 (1998).
- 811 7 van den Ent, F., Amos, L. A. & Löwe, J. Prokaryotic origin of the actin  
812 cytoskeleton. *Nature* **413**, 39-44 (2001).
- 813 8 Ursell, T. S. *et al.* Rod-like bacterial shape is maintained by feedback between  
814 cell curvature and cytoskeletal localization. *Proceedings of the National Academy*  
815 *of Sciences* **111**, E1025-E1034 (2014).
- 816 9 Jones, L. J., Carballido-López, R. & Errington, J. Control of cell shape in bacteria:  
817 helical, actin-like filaments in *Bacillus subtilis*. *Cell* **104**, 913-922 (2001).

- 818 10 Wachi, M. *et al.* Mutant isolation and molecular cloning of mre genes, which  
819 determine cell shape, sensitivity to mecillinam, and amount of penicillin-binding  
820 proteins in *Escherichia coli*. *Journal of Bacteriology* **169**, 4935-4940 (1987).
- 821 11 Bean, G. *et al.* A22 disrupts the bacterial actin cytoskeleton by directly binding  
822 and inducing a low-affinity state in MreB. *Biochemistry* **48**, 4852-4857 (2009).
- 823 12 Harris, L. K., Dye, N. A. & Theriot, J. A. A *Caulobacter* MreB mutant with irregular  
824 cell shape exhibits compensatory widening to maintain a preferred surface area  
825 to volume ratio. *Molecular microbiology* **94**, 988-1005 (2014).
- 826 13 Monds, R. D. *et al.* Systematic perturbation of cytoskeletal function reveals a  
827 linear scaling relationship between cell geometry and fitness. *Cell reports* **9**,  
828 1528-1537 (2014).
- 829 14 Shi, H. *et al.* Deep phenotypic mapping of bacterial cytoskeletal mutants reveals  
830 physiological robustness to cell size. *Current Biology* **27**, 3419-3429. e3414  
831 (2017).
- 832 15 Dye, N. A., Pincus, Z., Fisher, I. C., Shapiro, L. & Theriot, J. A. Mutations in the  
833 nucleotide binding pocket of MreB can alter cell curvature and polar morphology  
834 in *Caulobacter*. *Molecular microbiology* **81**, 368-394 (2011).
- 835 16 Kawazura, T. *et al.* Exclusion of assembled MreB by anionic phospholipids at cell  
836 poles confers cell polarity for bidirectional growth. *Molecular microbiology* **104**,  
837 472-486 (2017).
- 838 17 Tropini, C. *et al.* Principles of bacterial cell-size determination revealed by cell-  
839 wall synthesis perturbations. *Cell reports* **9**, 1520-1527 (2014).

- 840 18 Wang, S., Furchtgott, L., Huang, K. C. & Shaevitz, J. W. Helical insertion of  
841 peptidoglycan produces chiral ordering of the bacterial cell wall. *Proc Natl Acad*  
842 *Sci U S A* **109**, E595-604, doi:10.1073/pnas.1117132109 (2012).
- 843 19 Colavin, A., Hsin, J. & Huang, K. C. Effects of polymerization and nucleotide  
844 identity on the conformational dynamics of the bacterial actin homolog MreB.  
845 *Proceedings of the National Academy of Sciences* **111**, 3585-3590 (2014).
- 846 20 Colavin, A., Shi, H. & Huang, K. C. RodZ modulates geometric localization of the  
847 bacterial actin MreB to regulate cell shape. *Nature communications* **9**, 1280  
848 (2018).
- 849 21 Salje, J., van den Ent, F., de Boer, P. & Löwe, J. Direct membrane binding by  
850 bacterial actin MreB. *Mol Cell* **43**, 478-487, doi:10.1016/j.molcel.2011.07.008  
851 (2011).
- 852 22 Gitai, Z., Dye, N. A., Reisenauer, A., Wachi, M. & Shapiro, L. MreB actin-  
853 mediated segregation of a specific region of a bacterial chromosome. *Cell* **120**,  
854 329-341 (2005).
- 855 23 Awuni, Y., Jiang, S., Robinson, R. C. & Mu, Y. Exploring the A22-Bacterial Actin  
856 MreB Interaction through Molecular Dynamics Simulations. *The Journal of*  
857 *Physical Chemistry B* **120**, 9867-9874 (2016).
- 858 24 Shiomi, D. *et al.* Mutations in cell elongation genes mreB, mrdA and mrdB  
859 suppress the shape defect of RodZ-deficient cells. *Molecular microbiology* **87**,  
860 1029-1044 (2013).

- 861 25 Van Den Ent, F., Johnson, C. M., Persons, L., De Boer, P. & Löwe, J. Bacterial  
862 actin MreB assembles in complex with cell shape protein RodZ. *The EMBO*  
863 *journal* **29**, 1081-1090 (2010).
- 864 26 Bendezú, F. O., Hale, C. A., Bernhardt, T. G. & De Boer, P. A. RodZ (YfgA) is  
865 required for proper assembly of the MreB actin cytoskeleton and cell shape in *E.*  
866 *coli*. *The EMBO journal* **28**, 193-204 (2009).
- 867 27 Schmidt, A. *et al.* The quantitative and condition-dependent Escherichia coli  
868 proteome. *Nature biotechnology* **34**, 104 (2016).
- 869 28 Quint, D. A., Gopinathan, A. & Grason, G. M. Shape selection of surface-bound  
870 helical filaments: biopolymers on curved membranes. *Biophysical journal* **111**,  
871 1575-1585 (2016).
- 872 29 Deng, Y., Sun, M. & Shaevitz, J. W. Direct measurement of cell wall stress  
873 stiffening and turgor pressure in live bacterial cells. *Physical Review Letters* **107**,  
874 158101 (2011).
- 875 30 Hussain, S. *et al.* MreB filaments align along greatest principal membrane  
876 curvature to orient cell wall synthesis. *eLife* **7**, e32471 (2018).
- 877 31 Ouzounov, N. *et al.* MreB orientation correlates with cell diameter in Escherichia  
878 coli. *Biophysical journal* **111**, 1035-1043 (2016).
- 879 32 Hagen, N., Gao, L. & Tkaczyk, T. S. Quantitative sectioning and noise analysis  
880 for structured illumination microscopy. *Optics express* **20**, 403-413 (2012).
- 881 33 Levin, M. Left–right asymmetry in embryonic development: a comprehensive  
882 review. *Mechanisms of development* **122**, 3-25 (2005).

- 883 34 Schilthuizen, M. & Davison, A. The convoluted evolution of snail chirality.  
884 *Naturwissenschaften* **92**, 504-515 (2005).
- 885 35 Wang, J.-S. *et al.* Hierarchical chirality transfer in the growth of Towel Gourd  
886 tendrils. *Scientific reports* **3**, 3102 (2013).
- 887 36 Jauffred, L., Vejborg, R. M., Korolev, K. S., Brown, S. & Oddershede, L. B.  
888 Chirality in microbial biofilms is mediated by close interactions between the cell  
889 surface and the substratum. *The ISME journal* **11**, 1688 (2017).
- 890 37 Leaver-Fay, A. *et al.* in *Methods in enzymology* Vol. 487 545-574 (Elsevier,  
891 2011).
- 892 38 Wang, S. & Wingreen, N. S. Cell shape can mediate the spatial organization of  
893 the bacterial cytoskeleton. *Biophysical journal* **104**, 541-552 (2013).
- 894 39 Polka, J. K., Kollman, J. M., Agard, D. A. & Mullins, R. D. The structure and  
895 assembly dynamics of plasmid actin AlfA imply a novel mechanism of DNA  
896 segregation. *Journal of bacteriology* **191**, 6219-6230 (2009).
- 897 40 Wan, L. Q. *et al.* Micropatterned mammalian cells exhibit phenotype-specific left-  
898 right asymmetry. *Proceedings of the National Academy of Sciences* **108**, 12295-  
899 12300 (2011).
- 900 41 Pereira, A. R. *et al.* FtsZ-dependent elongation of a coccoid bacterium. *MBio* **7**,  
901 e00908-00916 (2016).
- 902 42 Phillips, J. C. *et al.* Scalable molecular dynamics with NAMD. *J. Comput. Chem.*  
903 **26**, 1781-1802, doi:10.1002/jcc.20289 (2005).
- 904 43 Best, R. B. *et al.* Optimization of the additive CHARMM all-atom protein force  
905 field targeting improved sampling of the backbone phi, psi and side-chain chi(1)

- 906 and chi(2) dihedral angles. *J Chem Theory Comput* **8**, 3257-3273,  
907 doi:10.1021/ct300400x (2012).
- 908 44 Mackerell, A. D., Jr., Feig, M. & Brooks, C. L., 3rd. Extending the treatment of  
909 backbone energetics in protein force fields: limitations of gas-phase quantum  
910 mechanics in reproducing protein conformational distributions in molecular  
911 dynamics simulations. *J. Comput. Chem.* **25**, 1400-1415, doi:10.1002/jcc.20065  
912 (2004).
- 913 45 Jorgensen, J. H., Johnson, J. E., Alexander, G. A., Paxson, R. & Alderson, G. L.  
914 Comparison of automated and rapid manual methods for the same-day  
915 identification of Enterobacteriaceae. *Am. J. Clin. Pathol.* **79**, 683-687 (1983).
- 916 46 Tuckerman, M., Berne, B. J. & Martyna, G. J. Reversible multiple time scale  
917 molecular dynamics. *J. Chem. Phys.* **97**, 1990-2001 (1992).
- 918 47 Brünger, A., Brooks, C. L. & Karplus, M. Stochastic boundary conditions for  
919 molecular dynamics simulations of ST2 water. *Chem Phys Lett* **105**, 495-500  
920 (1984).
- 921 48 Feller, S. E., Zhang, Y., Pastor, R. W. & Brooks, B. R. Constant pressure  
922 molecular dynamics simulation: the Langevin piston method. *J. Chem. Phys.*  
923 **103**, 4613-4621 (1995).
- 924 49 Humphrey, W., Dalke, A. & Schulten, K. VMD: visual molecular dynamics. *J. Mol.*  
925 *Graph.* **14**, 33-38, 27-28 (1996).
- 926 50 Hsin, J., Gopinathan, A. & Huang, K. C. Nucleotide-dependent conformations of  
927 FtsZ dimers and force generation observed through molecular dynamics

928 simulations. *Proc Natl Acad Sci U S A* **109**, 9432-9437,  
929 doi:10.1073/pnas.1120761109 (2012).

930 51 Pettersen, E. F. *et al.* UCSF Chimera—a visualization system for exploratory  
931 research and analysis. *Journal of computational chemistry* **25**, 1605-1612 (2004).

932 52 Zoete, V., Cuendet, M. A., Grosdidier, A. & Michielin, O. SwissParam: a fast  
933 force field generation tool for small organic molecules. *Journal of computational*  
934 *chemistry* **32**, 2359-2368 (2011).

935 53 Webb, B. & Sali, A. Comparative protein structure modeling using MODELLER.  
936 *Current protocols in protein science* **86**, 2.9. 1-2.9. 37 (2016).

937 54 Ursell, T. *et al.* Rapid, precise quantification of bacterial cellular dimensions  
938 across a genomic-scale knockout library. *BMC biology* **15**, 17 (2017).

939 55 Sliusarenko, O., Heinritz, J., Emonet, T. & Jacobs-Wagner, C. High-throughput,  
940 subpixel precision analysis of bacterial morphogenesis and intracellular spatio-  
941 temporal dynamics. *Molecular microbiology* **80**, 612-627 (2011).

942
